# Supplementary material
Source: PubMed Central journal article supplement (PMC10668528)
Supplement: NIHMS1943479-supplement-1.pdf [file NIHMS1943479-supplement-1.pdf]

| ROTEM Reaction | ROTEM Parameter (units) | Normal Range | N   | Etiology of ALI/ALF |               | P      |
|----------------|-------------------------|--------------|-----|---------------------|---------------|--------|
|                |                         |              |     | Non-APAP<br>N=97    | APAP<br>N=102 |        |
| <b>EXTEM</b>   | CT (sec)                | 43-82        | 161 | 88 ± 39             | 85 ± 33       | 0.23   |
|                | CFT (sec)               | 48-127       | 157 | 110 ± 102           | 100 ± 90      | 0.30   |
|                | α-angle (degrees)       | 65-80        | 160 | 70 ± 11             | 72 ± 13       | 0.26   |
|                | A10 (mm)                | NA           | 160 | 45 ± 17             | 48 ± 17       | 0.14   |
|                | MCF (mm)                | 52-70        | 160 | 54 ± 13             | 56 ± 14       | 0.10   |
| <b>INTEM</b>   | CT (sec)                | 122-208      | 163 | 203 ± 68            | 183 ± 42      | <0.001 |
|                | CFT (sec)               | 45-110       | 159 | 113 ± 108           | 97 ± 87       | 0.05   |
|                | α-angle (degrees)       | 70-81        | 162 | 70 ± 13             | 73 ± 12       | 0.02   |
|                | A10 (mm)                | NA           | 162 | 44 ± 16             | 47 ± 15       | 0.05   |
|                | MCF (mm)                | 51-72        | 162 | 51 ± 12             | 54 ± 12       | 0.06   |
| <b>FIBTEM</b>  | MCF (mm)                | 7-24         | 165 | 12 ± 10             | 13 ± 10       | 0.11   |

**Supplemental Table 1. Admission ROTEM parameters according to etiology of ALI/ALF.**

APAP, acetaminophen; non-APAP, non-acetaminophen; CT, clotting time; CFT, clot formation time; A10, amplitude at 10 minutes; MCF, maximal clot firmness; NA, not available (normal range not established).

| ROTEM Reaction | ROTEM Parameter (units) | Normal Range | N   | Maximum Hepatic Encephalopathy |                     | P    |
|----------------|-------------------------|--------------|-----|--------------------------------|---------------------|------|
|                |                         |              |     | Grade 0-2<br>N = 133           | Grade 3/4<br>N = 65 |      |
| <b>EXTEM</b>   | CT (sec)                | 43-82        | 160 | 85 ± 30                        | 101 ± 56            | 0.03 |
|                | CFT (sec)               | 48-127       | 156 | 101 ± 79                       | 117 ± 136           | 0.09 |
|                | α-angle (degrees)       | 65-80        | 159 | 71 ± 12                        | 71 ± 12             | 0.29 |
|                | A10 (mm)                | NA           | 159 | 48 ± 15                        | 44 ± 17             | 0.03 |
|                | MCF (mm)                | 52-70        | 159 | 56 ± 12                        | 54 ± 14             | 0.14 |
| <b>INTEM</b>   | CT (sec)                | 122-208      | 162 | 188 ± 40                       | 200 ± 79            | 0.01 |
|                | CFT (sec)               | 45-110       | 158 | 102 ± 83                       | 124 ± 152           | 0.12 |
|                | α-angle (degrees)       | 70-81        | 161 | 71 ± 12                        | 69 ± 18             | 0.10 |
|                | A10 (mm)                | NA           | 161 | 46 ± 15                        | 42 ± 19             | 0.07 |
|                | MCF (mm)                | 51-72        | 161 | 53 ± 13                        | 51 ± 16             | 0.59 |
| <b>FIBTEM</b>  | MCF (mm)                | 7-24         | 164 | 13 ± 9                         | 11 ± 10             | 0.08 |

**Supplemental Table 2. Admission ROTEM parameters according to maximum grade of hepatic encephalopathy reached during days 1-7.**

CT, clotting time; CFT, clot formation time; A10, amplitude at 10 minutes; MCF, maximal clot firmness; NA, not available (normal range not established).

| ROTEM Reaction | ROTEM Parameter (units) | Normal Range | N   | Renal Replacement Therapy |               | P      |
|----------------|-------------------------|--------------|-----|---------------------------|---------------|--------|
|                |                         |              |     | No<br>N = 152             | Yes<br>N = 48 |        |
| <b>EXTEM</b>   | CT (sec)                | 43-82        | 161 | 84 ± 29                   | 109 ± 66      | <0.001 |
|                | CFT (sec)               | 48-127       | 157 | 101 ± 71                  | 133 ± 118     | 0.01   |
|                | α-angle (degrees)       | 65-80        | 160 | 72 ± 9                    | 67 ± 20       | 0.004  |
|                | A10 (mm)                | NA           | 160 | 47 ± 15                   | 41 ± 17       | 0.01   |
|                | MCF (mm)                | 52-70        | 160 | 56 ± 12                   | 51 ± 15       | 0.04   |
| <b>INTEM</b>   | CT (sec)                | 122-208      | 163 | 188 ± 41                  | 211 ± 82      | 0.002  |
|                | CFT (sec)               | 45-110       | 159 | 99 ± 89                   | 136 ± 137     | 0.07   |
|                | α-angle (degrees)       | 70-81        | 162 | 72 ± 12                   | 66 ± 20       | 0.02   |
|                | A10 (mm)                | NA           | 162 | 46 ± 16                   | 41 ± 16       | 0.02   |
|                | MCF (mm)                | 51-72        | 162 | 53 ± 12                   | 51 ± 14       | 0.12   |
| <b>FIBTEM</b>  | MCF (mm)                | 7-24         | 165 | 14 ± 9                    | 11 ± 9        | 0.04   |

**Supplemental Table 3. Admission ROTEM parameters according to receipt of renal replacement therapy during days 1-7.**

CT, clotting time; CFT, clot formation time; A10, amplitude at 10 minutes; MCF, maximal clot firmness; NA, not available (normal range not established).

| ROTEM Reaction | ROTEM Parameter (units) | Normal Range | N   | Bleeding          |                   | P    |
|----------------|-------------------------|--------------|-----|-------------------|-------------------|------|
|                |                         |              |     | Absent<br>N = 181 | Present<br>N = 18 |      |
| <b>EXTEM</b>   | CT (sec)                | 43-82        | 161 | 86 ± 36           | 93 ± 35           | 0.50 |
|                | CFT (sec)               | 48-127       | 157 | 104 ± 86          | 112 ± 141         | 0.63 |
|                | α-angle (degrees)       | 65-80        | 160 | 71 ± 12           | 70 ± 22           | 0.65 |
|                | A10 (mm)                | NA           | 160 | 47 ± 17           | 45 ± 24           | 0.82 |
|                | MCF (mm)                | 52-70        | 160 | 55 ± 14           | 55 ± 18           | 0.99 |
| <b>INTEM</b>   | CT (sec)                | 122-208      | 163 | 192 ± 43          | 201 ± 37          | 0.21 |
|                | CFT (sec)               | 45-110       | 159 | 105 ± 95          | 124 ± 163         | 0.72 |
|                | α-angle (degrees)       | 70-81        | 162 | 71 ± 13           | 69 ± 25           | 0.73 |
|                | A10 (mm)                | NA           | 162 | 44 ± 16           | 43 ± 24           | 0.83 |
|                | MCF (mm)                | 51-72        | 162 | 52 ± 13           | 55 ± 17           | 0.73 |
| <b>FIBTEM</b>  | MCF (mm)                | 7-24         | 165 | 13 ± 10           | 11 ± 15           | 0.90 |

**Supplemental Table 4. Admission ROTEM parameters according to bleeding events during days 1-7.**

CT, clotting time; CFT, clot formation time; A10, amplitude at 10 minutes; MCF, maximal clot firmness; LT, liver transplantation; TFS, transplant-free survival; NA, not available (normal range not established).

| ROTEM Reaction | ROTEM Parameter (units) | Normal Range | N   | 21 Day Outcome   |              | P      |
|----------------|-------------------------|--------------|-----|------------------|--------------|--------|
|                |                         |              |     | LT/Death<br>N=59 | TFS<br>N=132 |        |
| <b>EXTEM</b>   | CT (sec)                | 43-82        | 155 | 104 ± 62         | 84 ± 30      | 0.005  |
|                | CFT (sec)               | 48-127       | 151 | 113 ± 80         | 102 ± 90     | 0.35   |
|                | α-angle (degrees)       | 65-80        | 154 | 71 ± 11          | 71 ± 12      | 0.65   |
|                | A10 (mm)                | NA           | 154 | 43 ± 14          | 48 ± 16      | 0.05   |
|                | MCF (mm)                | 52-70        | 154 | 51 ± 13          | 56 ± 13      | 0.09   |
| <b>INTEM</b>   | CT (sec)                | 122-208      | 157 | 214 ± 82         | 187 ± 37     | <0.001 |
|                | CFT (sec)               | 45-110       | 153 | 110 ± 115        | 104 ± 99     | 0.24   |
|                | α-angle (degrees)       | 70-81        | 156 | 70 ± 19          | 71 ± 12      | 0.09   |
|                | A10 (mm)                | NA           | 156 | 43 ± 15          | 47 ± 16      | 0.05   |
|                | MCF (mm)                | 51-72        | 156 | 49 ± 12          | 53 ± 14      | 0.20   |
| <b>FIBTEM</b>  | MCF (mm)                | 7-24         | 159 | 10 ± 10          | 13 ± 8       | 0.004  |

**Supplemental Table 5. Admission ROTEM parameters according to 21-day outcome.**

CT, clotting time; CFT, clot formation time; A10, amplitude at 10 minutes; MCF, maximal clot firmness; LT, liver transplantation; TFS, transplant-free survival; NA, not available (normal range not established).

### **Supplemental Figure Legends.**

**Supplemental Fig. 1. Change in ROTEM parameters over time according to maximal encephalopathy grade.** Maximal HE grade refers to the highest grade over the first 7 days of study admission; “0” HE refers to patients with ALI. Individual cells display the median and IQR values for the parameter on that day. Shading (light green to red) indicates the proportion of subjects with an abnormal ROTEM parameter for that day compared to reference values. HE, hepatic encephalopathy, CT, clotting time; CFT, clot formation time; alpha, alpha angle; MCF, maximal clot firmness.

**Supplemental Fig. 2. Change in ROTEM parameters over time according to renal replacement therapy.** RRT refers to the need for at least one application of renal replacement therapy over the first 7 days of study admission. Individual cells display the median and IQR values for the parameter on that day. Shading (light green to red) indicates the proportion of subjects with an abnormal ROTEM parameter for that day compared to reference values. RRT, renal replacement therapy, CT, clotting time; CFT, clot formation time; alpha, alpha angle; MCF, maximal clot firmness.

|        | Admission        | Day 2            | Day 3            | Day 4            | Day 5            |
|--------|------------------|------------------|------------------|------------------|------------------|
| FIBTEM | 86<br>(73,102)   | 80<br>(66,100)   | 79<br>(63,93)    | 73<br>(62,88)    | 72<br>(60,88)    |
| INTEMI | 188<br>(170,208) | 178<br>(156,208) | 179<br>(158,202) | 172<br>(158,192) | 174<br>(162,214) |
| EXTEM  | 100<br>(72,150)  | 103<br>(80,169)  | 102<br>(72,156)  | 99<br>(76,149)   | 100<br>(70,140)  |
| CT     | 99<br>(74,158)   | 101<br>(73,167)  | 97<br>(68,146)   | 93<br>(69,130)   | 99<br>(68,143)   |
| Alpha  | 71<br>(64,76)    | 72<br>(63,76)    | 72<br>(63,77)    | 71<br>(65,76)    | 72<br>(66,76)    |
| Alpha  | 71<br>(62,76)    | 73<br>(64,76)    | 72<br>(65,77)    | 72<br>(68,76)    | 72<br>(66,76)    |
| MCF    | 57<br>(50,61)    | 54<br>(48,61)    | 55<br>(47,61)    | 55<br>(48,61)    | 56<br>(49,64)    |
| MCF    | 53<br>(48,60)    | 52<br>(46,58)    | 54<br>(46,59)    | 55<br>(47,59)    | 54<br>(47,61)    |
| MCF    | 14<br>(9,18)     | 15<br>(10,19)    | 17<br>(10,21)    | 16<br>(11,21)    | 17<br>(12,22)    |

Maximum HE Grade 0-2

|        | Admission        | Day 2            | Day 3            | Day 4            | Day 5            |
|--------|------------------|------------------|------------------|------------------|------------------|
| FIBTEM | 106<br>(84,140)  | 85<br>(76,110)   | 82<br>(71,108)   | 77<br>(59,112)   | 78<br>(66,117)   |
| INTEMI | 207<br>(177,263) | 202<br>(174,221) | 195<br>(173,223) | 185<br>(169,234) | 209<br>(178,247) |
| EXTEM  | 119<br>(88,213)  | 120<br>(87,207)  | 134<br>(82,256)  | 150<br>(108,274) | 184<br>(114,290) |
| CT     | 106<br>(82,199)  | 142<br>(81,216)  | 130<br>(79,212)  | 134<br>(109,276) | 190<br>(110,314) |
| Alpha  | 70<br>(61,76)    | 68<br>(59,74)    | 68<br>(47,76)    | 68<br>(52,72)    | 67<br>(51,72)    |
| Alpha  | 70<br>(59,75)    | 66<br>(57,74)    | 66<br>(54,75)    | 68<br>(56,73)    | 62<br>(49,70)    |
| MCF    | 53<br>(46,60)    | 52<br>(45,60)    | 51<br>(40,59)    | 47<br>(38,54)    | 46<br>(42,53)    |
| MCF    | 51<br>(44,60)    | 49<br>(44,58)    | 50<br>(42,56)    | 48<br>(39,53)    | 46<br>(41,53)    |
| MCF    | 11<br>(6,16)     | 13<br>(9,17)     | 13<br>(9,20)     | 13<br>(9,16)     | 13<br>(10,18)    |

Maximum HE Grade 3-4

**Supplemental  
Figure 1.**

|       | Admission        | Day 2            | Day 3            | Day 4            | Day 5            |
|-------|------------------|------------------|------------------|------------------|------------------|
| CT    | 86<br>(74,102)   | 78<br>(68,98)    | 77<br>(63,92)    | 73<br>(60,89)    | 72<br>(61,88)    |
| CT    | 187<br>(170,208) | 176<br>(156,208) | 176<br>(157,203) | 173<br>(158,197) | 176<br>(162,220) |
| CFT   | 100<br>(71,141)  | 102<br>(80,169)  | 98<br>(71,152)   | 98<br>(74,144)   | 109<br>(74,138)  |
| CFT   | 97<br>(72,156)   | 93<br>(73,163)   | 92<br>(65,135)   | 94<br>(68,127)   | 103<br>(69,136)  |
| Alpha | 71<br>(66,76)    | 73<br>(64,75)    | 73<br>(65,77)    | 71<br>(65,76)    | 70<br>(66,76)    |
| Alpha | 72<br>(64,76)    | 73<br>(64,76)    | 72<br>(66,78)    | 73<br>(68,76)    | 72<br>(66,76)    |
| MCF   | 57<br>(50,62)    | 54<br>(48,61)    | 55<br>(48,62)    | 55<br>(48,61)    | 56<br>(49,62)    |
| MCF   | 53<br>(48,61)    | 53<br>(46,59)    | 54<br>(47,59)    | 54<br>(47,60)    | 54<br>(47,61)    |
| MCF   | 14<br>(9,18)     | 14<br>(9,19)     | 17<br>(10,21)    | 16<br>(11,21)    | 17<br>(12,21)    |

No RRT

|       | Admission        | Day 2            | Day 3            | Day 4            | Day 5            |
|-------|------------------|------------------|------------------|------------------|------------------|
| CT    | 112<br>(85,146)  | 96<br>(80,116)   | 91<br>(74,122)   | 78<br>(67,104)   | 78<br>(68,113)   |
| CT    | 215<br>(191,269) | 204<br>(187,220) | 201<br>(184,226) | 185<br>(170,227) | 206<br>(178,245) |
| CFT   | 133<br>(98,225)  | 168<br>(116,213) | 176<br>(133,312) | 199<br>(114,294) | 194<br>(106,272) |
| CFT   | 136<br>(97,229)  | 176<br>(122,227) | 180<br>(128,248) | 156<br>(116,252) | 194<br>(122,296) |
| Alpha | 67<br>(52,71)    | 66<br>(58,70)    | 63<br>(39,68)    | 62<br>(51,73)    | 65<br>(50,73)    |
| Alpha | 66<br>(53,72)    | 63<br>(54,69)    | 62<br>(54,68)    | 64<br>(55,72)    | 60<br>(50,68)    |
| MCF   | 50<br>(44,56)    | 48<br>(45,58)    | 47<br>(40,54)    | 46<br>(37,54)    | 46<br>(42,54)    |
| MCF   | 51<br>(43,57)    | 47<br>(41,56)    | 46<br>(42,52)    | 48<br>(40,53)    | 46<br>(40,52)    |
| MCF   | 10<br>(6,14)     | 12<br>(10,17)    | 13<br>(9,16)     | 14<br>(10,16)    | 13<br>(10,18)    |

RRT

Supplemental  
Figure 2.
